# Supplementary material for: Rewards of Caregiving and Coping Strategies of Caregivers of Patients With Mental Illness
Source: Atypon-hosted journal article supplement (doi:10.1176/appi.ps.001212012), 2013-02-01
Supplement: 185_ds001.pdf [file 185_ds001.pdf]

APPENDIX

Table 1: Characteristics of caregivers (n=60) and patients (n=60)

Data Supplement for Bauer et al. (10.1176/appi.ps.201200121)

| Characteristic                    | Detail                                       | Caregivers  |     | Patients    |     |
|-----------------------------------|----------------------------------------------|-------------|-----|-------------|-----|
|                                   |                                              | n           | (%) | n           | (%) |
| Sex                               | Female                                       | 39          | 65  | 25 (41.7)   | 42  |
|                                   | Male                                         | 21          | 35  | 35 (58.3)   | 58  |
| Age                               | ≤ 30 years                                   | 5           | 8   | 28 (46.7)   | 47  |
|                                   | 31 to 40 years                               | 13          | 22  | 11 (18.3)   | 18  |
|                                   | 41 to 50 years                               | 19          | 32  | 9 (15.0)    | 15  |
|                                   | 51 to 60 years                               | 11          | 18  | 8 (13.3)    | 13  |
|                                   | > 60 years                                   | 12          | 29  | 4 (6.7)     | 7   |
|                                   | Mean age in years (SD)                       | 48.8 (15.0) | -   | 37.3 (15.4) | -   |
| Highest level of education        | Secondary school to end of Grade 9           | 24          | 40  | 21 (35.0)   | 35  |
|                                   | Secondary school to end of Grade 10          | 22          | 37  | 17 (28.3)   | 28  |
|                                   | Secondary school to end of Grade 12          | 7           | 12  | 10 (16.7)   | 17  |
|                                   | University/College                           | 7           | 12  | 12 (20.2)   | 20  |
|                                   |                                              |             |     |             |     |
| Occupational situation            | Full time/Part time/In education or training | 34          | 57  | 31 (51.7)   | 52  |
|                                   | Not working/Retired                          | 26          | 43  | 25 (41.7)   | 42  |
|                                   | No information                               | -           | -   | 4 (6.7)     | 7   |
| Marital status                    | Single                                       | 15          | 25  | -           |     |
|                                   | Living with partner                          | 45          | 75  |             |     |
| Degree of kinship: Patient is ... | Spouse/Partner                               | 21          | 35  | -           |     |
|                                   | Parent                                       | 17          | 38  |             |     |
|                                   | Child                                        | 7           | 12  |             |     |
|                                   | Sibling                                      | 10          | 17  |             |     |
|                                   | Other relative/Friend                        | 4           | 7   |             |     |
| Common household with patient     | Yes                                          | 37          | 62  | -           |     |
|                                   | No                                           | 23          | 38  |             |     |
| Size of household                 | 1 person                                     | 4           | 7   | -           |     |
|                                   | 2-4 people                                   | 45          | 77  |             |     |
|                                   | 5 or more people                             | 10          | 17  |             |     |
| Support in caring for the patient | Yes                                          | 39          | 65  | -           |     |
|                                   | No                                           | 21          | 35  |             |     |
| Family's monthly net income       | ≤ €1000                                      | 9           | 15  | -           |     |
|                                   | €1001 - €2000                                | 28          | 47  |             |     |
|                                   | €2001 - €3000                                | 16          | 27  |             |     |
|                                   | > €3000                                      | 6           | 10  |             |     |
|                                   | Not specified                                | 1           | 2   |             |     |
| Contact with patient per week     | ≤ 2 hours                                    | 5           | 8   | -           |     |
|                                   | More than 2 hours to 5 hours                 | 15          | 25  |             |     |
|                                   | More than 5 hours to 15 hours                | 11          | 18  |             |     |
|                                   | More than 15 hours to 35 hours               | 5           | 8   |             |     |
|                                   |                                              | 24          | 40  |             |     |

|                                                         |                            |    |    |              |    |
|---------------------------------------------------------|----------------------------|----|----|--------------|----|
|                                                         | > 35 hours                 |    |    |              |    |
| Distance between place of residence and hospital        | ≤ 20 km                    | 24 | 40 | -            |    |
|                                                         | More than 20 km to 50 km   | 15 | 21 | 25           |    |
|                                                         | > 50 km                    |    |    | 35           |    |
| Caregiver has legal responsibility for the patient      | Yes                        | 8  | 52 | 13           | -  |
|                                                         | No                         |    |    | 87           |    |
| Participation in caregiver group                        | Yes                        | 7  | 53 | 12           | -  |
|                                                         | No                         |    |    | 88           |    |
| Duration of illness                                     | ≤ 15 years                 | -  |    | 37 (61.6)    | 62 |
|                                                         | > 15 years                 |    |    | 12 (20.0)    | 20 |
|                                                         | No information             |    |    | 11 (18.3)    | 18 |
| Previous psychotherapeutic treatment                    | Yes                        | -  |    | 13 (21.7)    | 22 |
|                                                         | No                         |    |    | 37 (61.7)    | 62 |
|                                                         | No information             |    |    | 10 (16.7)    | 17 |
| Ever attempted suicide                                  | Yes                        | -  |    | 14 (23.3)    | 23 |
|                                                         | No                         |    |    | 41 (68.3)    | 68 |
|                                                         | Unknown/Unclear            |    |    | 5 (8.3)      | 8  |
| Clinical Global Impression (CGI) Part 1 (Admission)     | “Moderately ill” or less   | -  |    | 8 (13.3)     | 13 |
|                                                         | More than “moderately ill” |    |    | 49 (81.7)    | 82 |
|                                                         | No information             |    |    | 3 (5.0)      | 5  |
| Global Assessment of Functioning (GAF) (Admission)      | ≤ 40 points                | -  |    | 37 (61.7)    | 62 |
|                                                         | 41-100 points              |    |    | 22 (36.7)    | 37 |
|                                                         | No information             |    |    | 1 (1.7)      | 2  |
|                                                         | Mean score (SD)            | -  |    | 38.6 (12.2)  | -  |
| Care situation 24 hours after admission                 | No care                    | -  |    | 38 (63.3)    | 63 |
|                                                         | Care arranged              |    |    | 17 (28.3)    | 28 |
|                                                         | No information             |    |    | 5 (8.3)      | 8  |
| Mental illness in first degree relative                 | Yes                        | -  |    | 13 (21.7)    | 22 |
|                                                         | No                         |    |    | 27 (45.0)    | 45 |
|                                                         | No information             |    |    | 20 (33.3)    | 33 |
| Duration of current hospital stay                       | ≤ 50 days                  | -  |    | 25 (41.7)    | 42 |
|                                                         | > 50 days                  |    |    | 32 (53.3)    | 53 |
|                                                         | No information             |    |    | 3 (5.0)      | 5  |
| Informative discussions with caregiver/ psychoeducation | Yes                        | -  |    | 22 (36.7)    | 37 |
|                                                         | No                         |    |    | 35 (58.3)    | 58 |
|                                                         | No information             |    |    | 3 (5.0)      | 5  |
| Clinical Global Impression (CGI) Part 1 (Discharge)     | “Moderately ill” or less   | -  |    | 25 (41.7)    | 42 |
|                                                         | More than “moderately ill” |    |    | 30 (50.0)    | 50 |
|                                                         | No information             |    |    | -5 (8.3)     | 8  |
|                                                         | Mean score (SD)            | -  |    | 3.2 (0.9)    | -  |
| Global Assessment of Functioning (GAF) (Discharge)      | ≤ 40 points                | -  |    | 7 (11.7)     | 12 |
|                                                         | 41-100 points              |    |    | 50 (83.3)    | 83 |
|                                                         | No information             |    |    | 3 (5.0)      | 5  |
|                                                         | Mean score (SD)            | -  |    | 57.2 ((15.9) | -  |
| Living situation of patient after discharge             | Alone                      | -  |    | 16 (26.7)    | 27 |
|                                                         | With family member(s)      |    |    | 42 (70.0)    | 70 |
|                                                         | No information             |    |    | 2 (3.3)      | 3  |

**Table 2:** Frequency of burdens and rewards named by caregivers in each diagnostic group

|                                                     |              | <b>ICD-10 diagnosis</b>                   |                                        |                                                     |                                                         |
|-----------------------------------------------------|--------------|-------------------------------------------|----------------------------------------|-----------------------------------------------------|---------------------------------------------------------|
|                                                     | <b>Total</b> | <b>Schizophrenia<br/>(F20)<br/>(n=15)</b> | <b>Depression<br/>(F31)<br/>(n=15)</b> | <b>Bipolar<br/>Disorder<br/>(F32/33)<br/>(n=15)</b> | <b>Personality<br/>Disorder<br/>(F60/61)<br/>(n=15)</b> |
| Number of burdens                                   | 787          | 180                                       | 233                                    | 197                                                 | 177                                                     |
| Number of rewards                                   | 413          | 88                                        | 107                                    | 93                                                  | 125                                                     |
| Ratio of “Number of burdens” to “Number of rewards” | 1.9          | 2.1                                       | 2.2                                    | 2.1                                                 | 1.4                                                     |

**Table 3: Coping strategies of caregivers (n=60)**

| Coping style (assessed with the Freiburg Questionnaire on Coping with Illness by F. Muthny, 1989) | ICD-10 diagnosis |            |               |               | Total (n=56) |      |      |     |     |
|---------------------------------------------------------------------------------------------------|------------------|------------|---------------|---------------|--------------|------|------|-----|-----|
|                                                                                                   | F2 (n=13)        | F31 (n=14) | F32/33 (n=15) | F60/61 (n=14) | Mean         | Mode | SD   | Min | Max |
| Depressive coping                                                                                 | 2.5              | 2.4        | 2.4           | 2.2           | 2.4          | 2.2  | 0.80 | 1.0 | 4.6 |
| Active, problem-oriented coping                                                                   | 3.6              | 3.5        | 3.3           | 3.4           | 3.5          | 3.4  | 0.90 | 1.0 | 5.0 |
| Distraction and building self-esteem                                                              | 2.6              | 2.8        | 2.5           | 3.0           | 2.7          | 2.8  | 0.71 | 1.0 | 4.4 |
| Religiousness and searching for meaning                                                           | 2.8              | 2.7        | 2.6           | 2.8           | 2.7          | 3.0  | 0.88 | 1.4 | 4.8 |
| Trivialization and wishful thinking                                                               | 2.7              | 2.3        | 1.8           | 2.1           | 2.2          | 1.0  | 0.89 | 1.0 | 4.7 |

Abbreviations: SD=standard deviation; Min= Minimum; Max=Maximum

**Table 4: Linear regression analysis with the dependent variable “Frequency of citing rewards”**

| Predictor variables                                                                  | Beta  | P value |
|--------------------------------------------------------------------------------------|-------|---------|
| Increased “religiousness and searching for meaning” as strategy to cope with illness | 0.425 | 0.001   |
| Younger age of caregiver                                                             | 0.378 | 0.002   |
| More namings of burdens                                                              | 0.343 | 0.005   |

Multiple linear regression: N=52; F(3.0)=10.410; p<0.000; R<sup>2</sup>=0.394
